# Supplementary material for: Trial Watch: Anticancer radioimmunotherapy
Source: PubMed Central journal article supplement — Oncoimmunology. 2013 Jul 3;2(9):e25595. doi: 10.4161/onci.25595 (PMC3850274; doi:10.4161/onci.25595), 2013-07-03
Supplement: onci-2-e25595-s01.pdf [file onci-2-e25595-s01.pdf]

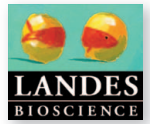

## **Supplemental Material to:**

**Erika Vacchelli, Ilio Vitale, Eric Tartour, Alexander Eggermont, Catherine Sautès-Fridman, Jérôme Galon, Laurence Zitvogel, Guido Kroemer, and Lorenzo Galluzzi**

**Trial watch**

**Anticancer radioimmunotherapy**

**Oncolmunology 2013; 2(9)**

**<http://dx.doi.org/10.4161/onci.25595>**

**[http://www.landesbioscience.com/journals/oncoimmunology/  
article/25595/](http://www.landesbioscience.com/journals/oncoimmunology/article/25595/)**

**Supplementary Table 1. Ongoing clinical trials testing anticancer radioimmunotherapy in cancer patients\***

| Approach  | Cancer type         | Status             | Phase | RT             | Single arm | RT vs No RT | RT1 vs RT2 | RT in both arms | Notes                                                                           | Ref         |
|-----------|---------------------|--------------------|-------|----------------|------------|-------------|------------|-----------------|---------------------------------------------------------------------------------|-------------|
| ACT       | CRC                 | Recruiting         | II    | EBRT           |            |             |            | X               | Combined with DC-CIK cells                                                      | NCT01839539 |
|           | Gastroesophageal    | Recruiting         | n.a.  | 3D-CRT<br>IMRT |            |             |            | X               | Alone or combined with DC-CIK cells                                             | NCT01691664 |
|           | HNC                 | Not yet recruiting | II    | EBRT           |            |             |            | X               | Combined with DC-CIK cells                                                      | NCT01821495 |
|           | Sarcoma             | Not yet recruiting | n.a.  | IMRT           | X          |             |            |                 | Combined with chemotherapy, as post-HSCT maintenance                            | NCT01795430 |
| Cytokines | CNS Neuroectodermal | Not yet recruiting | n.a.  | SIRT           | X          |             |            |                 | <sup>131</sup> I-MIBG combined with G-CSF and potassium iodide                  | NCT01850888 |
|           |                     | Recruiting         | III   | EBRT           |            |             |            | X               | Combined with IFN $\alpha$ -2b and temozolomide                                 | NCT01765088 |
|           | Melanoma            | Recruiting         | II    | SBRT           |            | X           |            |                 | Combined with IL-2                                                              | NCT01416831 |
| DC-based  | CNS Neuroectodermal | Recruiting         | II    | EBRT           |            |             |            | X               | Combined with surgery and temozolomide $\pm$ DCs pulsed with tumor cell lysates | NCT01567202 |
|           |                     | Not yet recruiting | II    | EBRT           |            | X           |            |                 | Combined with sipuleucel-T                                                      | NCT01807065 |
|           | Prostate            | Not yet recruiting | II    | SBRT           | X          |             |            |                 | Combined with sipuleucel-T                                                      | NCT01818986 |
|           |                     | Not yet recruiting | n.a.  | EBRT           | X          |             |            |                 | As single-fraction radiation therapy combined with sipuleucel-T                 | NCT01833208 |
|           | Sarcoma             | Recruiting         | II    | EBRT           |            |             | X          | X               | Alone or combined with intratumoral autologous DCs vaccine                      | NCT01347034 |
| ICDi      | Breast              | Recruiting         | III   | EBRT           |            |             |            | X               | Combined with TAC or TCX                                                        | NCT01354522 |

|      |                  |                       |        |                |   |   |   |                                                                     |                                                                                                                          |             |
|------|------------------|-----------------------|--------|----------------|---|---|---|---------------------------------------------------------------------|--------------------------------------------------------------------------------------------------------------------------|-------------|
| ICDi | Breast           | Recruiting            | n.a.   | EBRT           | X |   |   | Combined with aspirin, cyclophosphamide and methotrexate            | NCT01612247                                                                                                              |             |
|      | CRC              | Not yet recruiting    | II     | EBRT           | X |   |   | Combined with 5-FU as preoperative intervention, followed by FOLFOX | NCT01749956                                                                                                              |             |
|      |                  | Recruiting            | I/II   | EBRT           | X |   |   | Combined with capecitabine or 5-FU, hyperthermia and oxaliplatin    | NCT01716949                                                                                                              |             |
|      |                  | Recruiting            | II     | 3D-CRT<br>IMRT |   |   | X | X                                                                   | Combined with FOLFOXIRI                                                                                                  | NCT01333709 |
|      |                  | Recruiting            | II     | EBRT           | X |   |   |                                                                     | Combined with FOLFOX                                                                                                     | NCT01269229 |
|      |                  | Recruiting            | II     | EBRT           |   |   |   | X                                                                   | Combined with CAPOX                                                                                                      | NCT01643070 |
|      |                  | Recruiting            | II     | ERBT           | X |   |   |                                                                     | Combined with FOLFOX                                                                                                     | NCT01659424 |
|      |                  | Recruiting            | II     | ERBT           |   |   |   | X                                                                   | Combined with FOLFOX                                                                                                     | NCT01274962 |
|      |                  | Recruiting            | II/III | 3D-CRT<br>IMRT |   | X |   |                                                                     | Upon neoadjuvant FOLFOX, combined with chemotherapy                                                                      | NCT01515787 |
|      |                  | Recruiting            | III    | EBRT           |   | X |   |                                                                     | Followed by CAPOX + surgery                                                                                              | NCT01558921 |
|      |                  | Recruiting            | III    | EBRT           |   |   |   | X                                                                   | Combined with capecitabine ± oxaliplatin                                                                                 | NCT01653301 |
|      | Recruiting       | III                   | EBRT   |                |   |   | X | Combined with capecitabine and FOLFOX or FOLFOXIRI                  | NCT01804790                                                                                                              |             |
|      | Gastroesophageal | Active not recruiting | I      | EBRT           | X |   |   |                                                                     | Combined with erlotinib, 5-FU and oxaliplatin as neoadjuvant regimen, followed by surgery and consolidation chemotherapy | NCT01561014 |
|      |                  | Not yet recruiting    | II     | EBRT           | X |   |   |                                                                     | Combined with 5-FU, lapatinib and oxaliplatin                                                                            | NCT01769508 |
|      |                  | Not yet recruiting    | II     | EBRT           |   |   |   | X                                                                   | Combined with CAPOX ± carboplatin and paclitaxel                                                                         | NCT01843829 |
|      |                  | Recruiting            | II     | 3D-CRT<br>IMRT |   |   |   | X                                                                   | Combined with FOLFOX or carboplatin + paclitaxel                                                                         | NCT01333033 |
|      |                  | Recruiting            | II     | EBRT           |   | X |   |                                                                     | Combined with platin-based chemotherapy                                                                                  | NCT01362127 |
|      |                  | Recruiting            | II     | EBRT           |   |   |   | X                                                                   | As single agent or combined with oxaliplatin and raltitrexid                                                             | NCT01732380 |

|      |                  |                    |        |              |   |   |                                                                                                     |             |
|------|------------------|--------------------|--------|--------------|---|---|-----------------------------------------------------------------------------------------------------|-------------|
| ICDi | Gastroesophageal | Recruiting         | II/III | EBRT         | X |   | Combined with 5-FU, docetaxel and oxaliplatin                                                       | NCT01523015 |
|      |                  | Recruiting         | III    | EBRT         | X |   | Combined with CAPOX as preoperative intervention                                                    | NCT01815853 |
|      |                  | Recruiting         | III    | EBRT         | X |   | Combined with CAPOX                                                                                 | NCT01711242 |
|      |                  | Recruiting         | III    | EBRT         | X |   | Combined with oxaliplatin and S-1                                                                   | NCT01761461 |
|      |                  | Not yet recruiting | III    | EBRT         |   | X | Combined with ABVD or BEACOPP                                                                       | NCT01652261 |
|      |                  | Recruiting         | II     | EBRT<br>IFRT | X |   | Combined with ABVD-BEACOPP                                                                          | NCT01468740 |
|      |                  | Recruiting         | II     | EBRT<br>IFRT | X |   | Combined with MBVD                                                                                  | NCT01523847 |
|      |                  | Recruiting         | II     | INRT         | X |   | Combined with ABVD-BEACOPP                                                                          | NCT01390584 |
|      |                  | Recruiting         | III    | EBRT         |   | X | Combined with ABVE-PC                                                                               | NCT01858922 |
|      |                  | Recruiting         | III    | EBRT         |   | X | Combined with cyclophosphamide-based chemotherapy ± hydrocortisone sodium succinate and vincristine | NCT01406756 |
|      |                  | Recruiting         | III    | IFRT<br>INRT | X | X | Combined with ABVD-BEACOPP                                                                          | NCT01356680 |
|      |                  | Recruiting         | n.a.   | n.s.         | X |   | Combined with ABVD and brentuximab                                                                  | NCT01578967 |
|      |                  | Not yet recruiting | II     | PBRT         | X |   | Combined with FOLFOXIRI and losartan                                                                | NCT01821729 |
|      |                  | Recruiting         | II     | EBRT         | X |   | Combined with FOLFOXIRI and capecitabine                                                            | NCT01397019 |
|      |                  | Recruiting         | II     | EBRT         | X |   | Combined with FOLFOXIRI and gemcitabine-based chemotherapy                                          | NCT01560949 |
|      |                  | Recruiting         | II     | EBRT         |   | X | Following FOLFOXIRI                                                                                 | NCT01726582 |
|      |                  | Recruiting         | II     | IMRT         | X |   | Combined with FOLFOXIRI and gemcitabine                                                             | NCT01661088 |
|      |                  | Recruiting         | II     | PBRT         | X |   | Combined with capecitabine and FOLFOXIRI                                                            | NCT01591733 |
|      |                  | Recruiting         | II     | PBRT         | X |   | Combined with CAPOX + erlotinib and gemcitabine                                                     | NCT01683422 |

|      |                     |                       |      |      |   |                                                   |                                                                                           |             |
|------|---------------------|-----------------------|------|------|---|---------------------------------------------------|-------------------------------------------------------------------------------------------|-------------|
| ICDi | Pancreatic          | Recruiting            | II   | SIRT | X | As <sup>90</sup> Y-based RE, combined with FOLFOX | NCT01581307                                                                               |             |
|      |                     | Recruiting            | III  | EBRT |   | X                                                 | Combined with FOLFOXIRI and gemcitabine as induction therapy                              | NCT01827553 |
|      |                     | Recruiting            | III  | EBRT |   | X                                                 | Combined with FOLFOXIRI, 5-FU and gemcitabine                                             | NCT01836432 |
|      |                     | Recruiting            | n.a. | EBRT | X |                                                   | Combined with gemcitabine and FOLFOXIRI                                                   | NCT01821612 |
|      |                     | Recruiting            | n.a. | IORT |   | X                                                 | Combined with FOLFOXIRI                                                                   | NCT01760694 |
|      |                     | Recruiting            | n.a. | SBRT |   | X                                                 | Combined with FOLFOXIRI ± cyclophosphamide                                                | NCT01595321 |
|      | Sarcoma             | Recruiting            | II   | EBRT | X |                                                   | Combined with cyclophosphamide-containing chemotherapy                                    | NCT01696669 |
|      |                     | Recruiting            | II   | EBRT |   | X                                                 | Combined with cyclophosphamide-containing chemotherapy                                    | NCT01864109 |
|      |                     | Recruiting            | n.a. | EBRT |   | X                                                 | Combined with doxorubicin and ifosfamide ± pazopanib                                      | NCT01446809 |
|      | Other               | Active not recruiting | IV   | SIRT |   | X                                                 | As <sup>90</sup> Y-based RE                                                               | NCT01798160 |
|      |                     | Recruiting            | II   | SIRT |   | X                                                 | As <sup>90</sup> Y-based RE                                                               | NCT01381211 |
|      |                     | Recruiting            | IV   | SIRT |   | X                                                 | As <sup>90</sup> Y-based RE                                                               | NCT01798147 |
|      |                     | Recruiting            | n.a. | EBRT |   | X                                                 | Combined with cyclophosphamide, dactinomycin and vincristine ± doxorubicin and ifosfamide | NCT01464606 |
| mAb  | Breast              | Recruiting            | 0    | SIRT | X | <sup>111</sup> In-conjugated anti-ERBB2 mAb       | NCT01445054                                                                               |             |
|      |                     | Recruiting            | III  | EBRT |   | X                                                 | Combined with trastuzumab                                                                 | NCT01772472 |
|      |                     | Recruiting            | n.a. | EBRT |   | X                                                 | Combined with fresolimumab                                                                | NCT01401062 |
|      | CNS Neuroectodermal | Recruiting            | I    | HSRS | X |                                                   | Combined with bevacizumab                                                                 | NCT01392209 |
|      |                     | Recruiting            | I    | WBRT | X |                                                   | Combined with bevacizumab                                                                 | NCT01332929 |
|      |                     | Recruiting            | I/II | EBRT | X |                                                   | Combined with minocycline and bevacizumab                                                 | NCT01580969 |

|                  |                          |            |      |                        |   |                                                  |                                                          |             |
|------------------|--------------------------|------------|------|------------------------|---|--------------------------------------------------|----------------------------------------------------------|-------------|
| mAb              | CNS<br>Neuroectodermal   | Recruiting | II   | 3D-CRT<br>IMRT<br>PBRT | X | Combined with bevacizumab                        | NCT01730950                                              |             |
|                  |                          | Recruiting | II   | EBRT                   | X | Combined with temozolomide<br>and bevacizumab    | NCT01740258                                              |             |
|                  |                          | Recruiting | II   | EBRT                   |   | X                                                | Combined with bevacizumab                                | NCT01443676 |
|                  |                          | Recruiting | II   | EBRT                   |   | X                                                | Combined with temozolomide<br>and bevacizumab            | NCT01390948 |
|                  |                          | Recruiting | II   | HSRS                   | X |                                                  | Combined with temozolomide<br>and bevacizumab            | NCT01478321 |
|                  |                          | Recruiting | III  | EBRT                   | X |                                                  | Combined with bevacizumab                                | NCT01860638 |
|                  |                          | Recruiting | II   | PRDR                   |   | X                                                | Combined with bevacizumab                                | NCT01743950 |
|                  |                          | Unknown    | 0    | EBRT                   | X |                                                  | Combined with bevacizumab                                | NCT01331616 |
|                  | CRC                      | Recruiting | I    | EBRT                   | X |                                                  | Combined with capecitabine and baviximab                 | NCT01634685 |
|                  |                          | Recruiting | I    | EBRT                   | X |                                                  | Combined with 5-FU,<br>mitomycin and cetuximab           | NCT01621217 |
|                  |                          | Recruiting | I/II | EBRT                   | X |                                                  | Combined with 5-FU,<br>mitomycin and panitumumab         | NCT01581840 |
|                  |                          | Recruiting | II   | EBRT                   | X |                                                  | Combined with 5-FU,<br>mitomycin and panitumumab         | NCT01285778 |
|                  |                          | Recruiting | II   | EBRT<br>IMRT<br>IGRT   | X |                                                  | Combined with capecitabine and bevacizumab               | NCT01759238 |
|                  |                          | Recruiting | II   | IMRT                   | X |                                                  | Combined with capecitabine, mitomycin and<br>panitumumab | NCT01843452 |
|                  |                          | Recruiting | II   | SBRT                   | X |                                                  | Combined with bevacizumab                                | NCT01569984 |
| Gastroesophageal | Active not<br>recruiting | II         | IMRT | X                      |   | Combined with nimotuzumab                        | NCT01463605                                              |             |
|                  | Active not<br>recruiting | II/III     | EBRT |                        | X | Combined with 5-FU, cisplatin and<br>nimotuzumab | NCT01249352                                              |             |
|                  | Recruiting               | II         | EBRT |                        | X | Combined with 5-FU and cisplatin ± cetuximab     | NCT01787006                                              |             |

|     |                  |                       |        |              |   |   |                                                                                                                |             |
|-----|------------------|-----------------------|--------|--------------|---|---|----------------------------------------------------------------------------------------------------------------|-------------|
| mAb | Gastroesophageal | Recruiting            | II/III | EBRT         |   | X | Combined with nimotuzumab                                                                                      | NCT01402180 |
|     |                  | Recruiting            | I      | SIRT         | X |   | <sup>90</sup> Y-conjugated anti-CD45 mAb followed by allo-PBSCT, cyclosporine and MMf                          | NCT01300572 |
|     |                  | Recruiting            | I      | SIRT         | X |   | <sup>90</sup> Y-conjugated anti-CD45 mAb followed by allo-PBSCT, cyclosporine and MMf                          | NCT01503242 |
|     |                  | Recruiting            | I/II   | EBRT         | X |   | Combined with ipilimumab                                                                                       | NCT01769222 |
|     |                  | Recruiting            | II     | EBRT         |   | X | Combined with standard chemotherapy + rituximab                                                                | NCT01399372 |
|     |                  | Recruiting            | II     | EBRT<br>SIRT | X |   | <sup>90</sup> Y-conjugated anti-CD20 mAb or EBRT combined with allo-HSCT, ATG, cyclosporine, MMf and rituximab | NCT01811368 |
|     | Hematological    | Recruiting            | II     | SIRT         | X |   | <sup>131</sup> I-conjugated anti-CD20 mAb combined with belinostat and rituximab                               | NCT01686165 |
|     |                  | Recruiting            | II     | SIRT         | X |   | <sup>131</sup> I-conjugated anti-CD20 mAb combined with methotrexate                                           | NCT01389076 |
|     |                  | Recruiting            | II     | SIRT         | X |   | <sup>131</sup> I-conjugated anti-CD20 mAb combined with velcade and rituximab                                  | NCT01497275 |
|     |                  | Recruiting            | II     | SIRT         | X |   | <sup>90</sup> Y-conjugated anti-CD20 mAbs                                                                      | NCT01434472 |
|     |                  | Recruiting            | III    | EBRT<br>IFRT |   | X | Combined with vincristine and rituximab                                                                        | NCT01478542 |
|     |                  | Recruiting            | n.a.   | EBRT         |   | X | As single agent or combined with rituximab                                                                     | NCT01473628 |
|     |                  | Active not recruiting | II     | IMRT         |   | X | Combined with cetuximab or cisplatin + docetaxel                                                               | NCT01614938 |
|     |                  | Completed             | I      | EBRT         | X |   | Combined with bortezomib and cetuximab ± cisplatin                                                             | NCT01445405 |
|     | HNC              | Not yet recruiting    | II     | EBRT         |   | X | Combined with nimotuzumab                                                                                      | NCT01345084 |
|     |                  | Not yet recruiting    | III    | EBRT         |   | X | Combined with cisplatin or cetuximab                                                                           | NCT01855451 |
|     |                  | Recruiting            | I      | EBRT         | X |   | Combined with MLN8237 and cetuximab                                                                            | NCT01540682 |
|     |                  | Recruiting            | I      | EBRT         | X |   | Combined with olaparib and cetuximab                                                                           | NCT01758731 |

|     |     |            |        |        |   |  |                                        |                                                                      |             |
|-----|-----|------------|--------|--------|---|--|----------------------------------------|----------------------------------------------------------------------|-------------|
| mAb | HNC | Recruiting | I      | IMRT   | X |  | Combined with cetuximab and ipilimumab | NCT01860430                                                          |             |
|     |     | Recruiting | I/II   | EBRT   | X |  |                                        | Combined with cisplatin and cetuximab                                | NCT01760811 |
|     |     | Recruiting | I/II   | EBRT   | X |  |                                        | Combined with EGFR-targeting antisense DNA and cetuximab             | NCT01592721 |
|     |     | Recruiting | I/II   | IMRT   | X |  |                                        | Combined with cetuximab                                              | NCT01712919 |
|     |     | Recruiting | II     | 3D-CRT | X |  |                                        | Combined with cisplatin or cetuximab                                 | NCT01472653 |
|     |     | Recruiting | II     | EBRT   | X |  |                                        | Upon TPE-A, in combination with cisplatin, cetuximab and bevacizumab | NCT01588431 |
|     |     | Recruiting | II     | EBRT   | X |  |                                        | Combined with carboplatin, cisplatin and cetuximab                   | NCT01326923 |
|     |     | Recruiting | II     | EBRT   | X |  |                                        | Combined with docetaxel and cetuximab                                | NCT01794845 |
|     |     | Recruiting | II     | EBRT   | X |  |                                        | Combined with cisplatin, docetaxel and cetuximab                     | NCT01440270 |
|     |     | Recruiting | II     | EBRT   |   |  | X                                      | Combined with cisplatin and cetuximab                                | NCT01435252 |
|     |     | Recruiting | II     | EBRT   |   |  | X                                      | Combined with cisplatin or cetuximab                                 | NCT01504815 |
|     |     | Recruiting | II     | IMRT   | X |  |                                        | Combined with cetuximab                                              | NCT01271439 |
|     |     | Recruiting | II     | IMRT   | X |  |                                        | Combined with cisplatin and cetuximab upon ACF induction therapy     | NCT01566435 |
|     |     | Recruiting | II     | IMRT   | X |  |                                        | Combined with 5-FU, cisplatin, docetaxel and cetuximab               | NCT01326559 |
|     |     | Recruiting | II     | IMRT   |   |  | X                                      | Combined with cisplatin, docetaxel and nimotuzumab                   | NCT01516996 |
|     |     | Recruiting | II/III | EBRT   | X |  |                                        | Combined with cisplatin, docetaxel and cetuximab                     | NCT01434394 |
|     |     | Recruiting | II/III | IMRT   |   |  | X                                      | Combined with cetuximab and cisplatin and/or docetaxel               | NCT01810913 |
|     |     | Recruiting | III    | EBRT   |   |  | X                                      | Combined with carboplatin ± cetuximab                                | NCT01706939 |
|     |     | Recruiting | III    | EBRT   |   |  | X                                      | Combined with cisplatin ± nimotuzumab                                | NCT00957086 |
|     |     | Recruiting | III    | IMRT   |   |  | X                                      | Combined with cetuximab                                              | NCT01311063 |



|            |                        |                       |      |                       |   |   |                                            |                                                       |             |
|------------|------------------------|-----------------------|------|-----------------------|---|---|--------------------------------------------|-------------------------------------------------------|-------------|
| mAb        | HNC                    | Recruiting            | III  | IMRT                  |   | X | Combined with cisplatin or cetuximab       | NCT01302834                                           |             |
|            |                        | Recruiting            | IV   | 3D-CRT<br>IMRT        |   | X |                                            | Combined with cetuximab                               | NCT01553032 |
|            |                        | Recruiting            | n.a. | EBRT                  | X |   |                                            | Combined with cetuximab                               | NCT01663259 |
|            |                        | Recruiting            | n.a. | EBRT                  |   |   | X                                          | Combined with cisplatin or cetuximab                  | NCT01790516 |
|            |                        | Unknown               | II   | EBRT                  |   |   | X                                          | Combined with cisplatin ± cetuximab                   | NCT01301248 |
|            | Melanoma               | Active not recruiting | I    | EBRT                  | X |   |                                            | Combined with ipilimumab                              | NCT01557114 |
|            |                        | Recruiting            | 0    | SIRT                  | X |   |                                            | Combined with ipilimumab                              | NCT01730157 |
|            |                        | Recruiting            | I    | SRS<br>WBRT           |   | X |                                            | Combined with ipilimumab                              | NCT01703507 |
|            |                        | Recruiting            | I/II | SBRT                  | X |   |                                            | Combined with ipilimumab                              | NCT01497808 |
|            |                        | Recruiting            | II   | EBRT                  |   | X |                                            | Combined with ipilimumab                              | NCT01689974 |
|            |                        | Recruiting            | II   | SART                  | X |   |                                            | Combined with ipilimumab                              | NCT01565837 |
|            |                        | Recruiting            | n.a. | EBRT                  | X |   |                                            | Combined with ipilimumab                              | NCT01449279 |
|            | Pancreatic             | Active not recruiting | I    | 3D-CRT                |   |   | X                                          | Combined with capecitabine, ganitumab and gemcitabine | NCT01298401 |
|            | Other                  | Recruiting            | I    | Brachytherapy<br>EBRT | X |   |                                            | Combined with cisplatin and ipilimumab                | NCT01711515 |
| Recruiting |                        | II                    | EBRT | X                     |   |   | Combined with panitumumab                  | NCT01634880                                           |             |
| OV         | HNC                    | Recruiting            | I    | EBRT                  | X |   | Combined with cisplatin and vaccinia virus | NCT01584284                                           |             |
| TLRAs      | Breast                 | Recruiting            | I/II | EBRT                  | X |   | Combined with imiquimod                    | NCT01421017                                           |             |
|            | CRC                    | Recruiting            | II   | SBRT                  | X |   | Combined with IMM-101                      | NCT01539824                                           |             |
|            | Hematological          | Recruiting            | I    | EBRT                  | X |   | Combined with SD-101                       | NCT01745354                                           |             |
|            | HNC                    | Not yet recruiting    | I    | IMRT                  | X |   | Combined with cisplatin and entolimod      | NCT01728480                                           |             |
| Vaccine    | CNS<br>Neuroectodermal | Active not recruiting | I    | EBRT                  | X |   | Combined with multi-peptide vaccine        | NCT01222221                                           |             |

|                  |                     |                       |        |      |   |                                                                                     |                                                                                            |             |
|------------------|---------------------|-----------------------|--------|------|---|-------------------------------------------------------------------------------------|--------------------------------------------------------------------------------------------|-------------|
| Combinatorial    | Breast              | Recruiting            | II     | EBRT | X | Combined with cyclophosphamide, doxorubicin, paclitaxel and trastuzumab             | NCT01750073                                                                                |             |
|                  |                     | Recruiting            | II     | EBRT | X | Combined with cyclophosphamide, doxorubicin, paclitaxel, pertuzumab and trastuzumab | NCT01796197                                                                                |             |
|                  |                     | Recruiting            | n.a.   | EBRT |   | X                                                                                   | Combined with docetaxel and epirubicin ± cyclophosphamide, hormone therapy and trastuzumab | NCT01503905 |
|                  | CNS Neuroectodermal | Not yet recruiting    | II     | EBRT | X |                                                                                     | As consolidation therapy upon PBSCT                                                        | NCT01857934 |
|                  |                     | Not yet recruiting    | II/III | IGRT | X |                                                                                     | Combined with busulfan and melphalan, as consolidation therapy upon auto-HSCT              | NCT01798004 |
|                  |                     | Recruiting            | n.a.   | EBRT | X |                                                                                     | Combined with auto-PBSCT, carboplatin, etoposide, G-CSF, isotretinoin and melphalan        | NCT01526603 |
|                  | CRC                 | Active not recruiting | II     | EBRT | X |                                                                                     | Combined with bevacizumab, capecitabine and oxaliplatin                                    | NCT01434147 |
|                  |                     | Active not recruiting | II     | EBRT | X |                                                                                     | Combined with bevacizumab, FOLFOX and raltitrexed                                          | NCT01481545 |
|                  |                     | Active not recruiting | II     | SIRT | X |                                                                                     | <sup>90</sup> Y-conjugated anti-CEA mAb combined with FOLFIRI or FOLFOX ± bevacizumab      | NCT01320683 |
|                  |                     | Recruiting            | I      | IMRT | X |                                                                                     | Combined with bevacizumab and FOLFOX                                                       | NCT01395667 |
|                  |                     | Recruiting            | II     | EBRT | X |                                                                                     | Combined with 5-FU, bevacizumab and oxaliplatin                                            | NCT01554059 |
|                  |                     | Recruiting            | II     | IMRT | X |                                                                                     | Combined with bevacizumab and CAPOX                                                        | NCT01818973 |
|                  |                     | Recruiting            | III    | SIRT |   | X                                                                                   | Combined with FOLFOX                                                                       | NCT01721954 |
|                  |                     | Recruiting            | n.a.   | SBRT |   | X                                                                                   | Combined with CAPOX or FOLFOX + bevacizumab                                                | NCT01792934 |
|                  |                     | Recruiting            | II     | EBRT |   | X                                                                                   | Combined with 5-FU, capecitabine, cyclophosphamide and peptide vaccine                     | NCT01507103 |
| Gastroesophageal | Recruiting          | I                     | EBRT   | X    |   | Combined with carboplatin, CAPOX, cetuximab, everolimus and paclitaxel              | NCT01490749                                                                                |             |

|               |                  |            |                       |                |                        |                                                         |                                                                           |                                                                                             |             |
|---------------|------------------|------------|-----------------------|----------------|------------------------|---------------------------------------------------------|---------------------------------------------------------------------------|---------------------------------------------------------------------------------------------|-------------|
| Combinatorial | Gastroesophageal | Recruiting | II                    | EBRT           | X                      | Combined with capecitabine, oxaliplatin and trastuzumab | NCT01748773                                                               |                                                                                             |             |
|               |                  | Recruiting | II                    | EBRT           | X                      | Combined with FOLFOX and panitumumab                    | NCT01307956                                                               |                                                                                             |             |
|               |                  | Recruiting | n.a.                  | 3D-CRT<br>IMRT |                        | X                                                       | Combined with cisplatin and paclitaxel ± DC-CIK cells                     | NCT01691625                                                                                 |             |
|               | Hematological    | Recruiting | I                     | SIRT           | X                      |                                                         | <sup>90</sup> Y-conjugated anti-CD45 mAb followed by auto-PBSCT           | NCT01678443                                                                                 |             |
|               |                  | Recruiting | II                    | EBRT           | X                      |                                                         | Combined with conventional chemotherapy + rituximab                       | NCT01290120                                                                                 |             |
|               |                  | Recruiting | II                    | EBRT<br>IFRT   |                        | X                                                       | Combined with rituximab as consolidation regimen upon chemoimmunotherapy  | NCT01516593                                                                                 |             |
|               |                  | Recruiting | II                    | IFRT<br>SIRT   | X                      |                                                         | Combined with R-CHOP regimen and <sup>90</sup> Y-conjugated anti-CD20 mAb | NCT01359592                                                                                 |             |
|               |                  | HNC        | Recruiting            | II             | 3D-CRT<br>IGRT<br>IMRT | X                                                       |                                                                           | Combined with cetuximab, cisplatin, docetaxel, erythropoietin, folinic acid, 5-FU and G-CSF | NCT01467115 |
|               |                  | Pancreatic | Active not recruiting | I              | EBRT                   | X                                                       |                                                                           | Combined with gemcitabine, GM-CSF, tadalafil and a telomerase-specific vaccine              | NCT01342224 |
|               | Recruiting       |            | I                     | SBRT           | X                      |                                                         | Combined with FOLFOXIRI and G-CSF                                         | NCT01446458                                                                                 |             |
|               | Prostate         | Recruiting | II                    | EBRT           |                        | X                                                       | Combined with ADT or L-BLP25                                              | NCT01496131                                                                                 |             |
|               | Sarcoma          | Recruiting | I                     | EBRT           | X                      |                                                         | Combined with doxorubicin and bevacizumab                                 | NCT01746238                                                                                 |             |
|               | Other            | Recruiting | I                     | EBRT           | X                      |                                                         | Combined with autologous CD8 <sup>+</sup> T cells, IFN $\beta$ and IL-2   | NCT01758458                                                                                 |             |
|               |                  | Recruiting | I/II                  | EBRT           |                        | X                                                       | Combined with peptide vaccine + hiltonol                                  | NCT01720836                                                                                 |             |
|               |                  | Recruiting | n.a.                  | EBRT           | X                      |                                                         | As maintenance therapy upon auto-HSCT                                     | NCT01505569                                                                                 |             |

**Abbreviations:** 3D-CRT, 3D conformal RT; 5-FU, 5-fluorouracil; ABVD, doxorubicin, bleomycin, vinblastine, dacarbazine; ACF, paclitaxel, cisplatin and 5-FU; ACT, adoptive cell transfer; ADT, androgen-deprivation therapy; ATG, anti-thymocyte globulin; BEACOPP, bleomycin, etoposide, doxorubicin, cyclophosphamide, vincristine, procarbazine, prednisone; CAPOX, capecitabine, oxaliplatin; CNS, central nervous system; CRC, colorectal carcinoma; DC, dendritic cell; DC-CIK, dendritic and cytokine-

induced killer; EBRT, external beam RT; EGFR, epidermal growth factor receptor; FOLFIRI, folinic acid, 5-FU, irinotecan; FOLFOX, folinic acid, 5-FU, oxaliplatin; FOLFOXIRI, folinic acid, 5-FU, oxaliplatin, irinotecan; G-CSF, granulocyte colony-stimulating factor; GM-CSF, granulocyte macrophage colony-stimulating factor; HNC, head and neck carcinoma; HSCT, hematopoietic stem cell transplantation; HSRS, hypofractionated stereotactic radiosurgery; ICDi, immunogenic cell death inducer; IFN, interferon; IFRT, involved field radiotherapy; IGRT, image guided RT; IL, interleukin; IMRT, intensity-modulated RT; INRT, involved nodal RT; IORT, intraoperative RT; mAb, monoclonal antibody; MIBG, metaiodobenzylguanidine; MMf, mycophenolate mofetil; n.a., not available, n.s., not specified; OV, oncolytic virus; PBRT, proton beam RT; PBSCT, peripheral blood stem cell transplantation; PRDR, pulse reduced dose rate radiation; R-CHOP, cyclophosphamide, doxorubicin hydrochloride, vincristine sulfate, prednisone, rituximab; RE, radioembolization; RT, radiation therapy; SART, stereotactic ablative RT; SBRT, stereotactic body RT; SIRT, selective internal RT; SRS, stereotactic radiosurgery; TAC, docetaxel, doxorubicin, cyclophosphamide; TCX, docetaxel, cyclophosphamide, capecitabine; TPE-A, docetaxel, cisplatin, cetuximab, bevacizumab; TLRA, Toll-like receptor agonist; VEGF, vascular endothelial growth factor; WBRT, whole-brain RT. \*started after 2011 January, 1<sup>st</sup> and not withdrawn, terminated or suspended at the day of submission (source [www.clinicaltrials.gov](http://www.clinicaltrials.gov)).
